# Supplementary material for: Tungsten(vi) selenide tetrachloride, WSeCl4 – synthesis, properties, coordination complexes and application of [WSeCl4(SenBu2)] for CVD growth of WSe2 thin films
Source: Royal Society of Chemistry journal article supplement (doi:10.1039/d1dt03980f), 2022-01-01
Supplement: d1dt03980f2.pdf [file d1dt03980f2.pdf]

ESI

**Tungsten(VI) selenide tetrachloride, WSeCl<sub>4</sub> – synthesis, properties,  
 coordination complexes and application for CVD growth of WSe<sub>2</sub> thin films**

Victoria K. Greenacre, Andrew L. Hector, Ruomeng Huang, William Levason, Vikesh Sethi and Gillian

Reid

Table S1 Crystallographic parameters.

| Compound                                                  | WSeCl <sub>4</sub>      | [WSeCl <sub>4</sub> (OPPh <sub>3</sub> )]             | [WSeCl <sub>4</sub> (DMF)]                           | [(WSeCl <sub>4</sub> ) <sub>2</sub> (4,4'-bipy)]·3C <sub>6</sub> H <sub>6</sub>               |
|-----------------------------------------------------------|-------------------------|-------------------------------------------------------|------------------------------------------------------|-----------------------------------------------------------------------------------------------|
| Formula                                                   | Cl <sub>4</sub> SeW     | C <sub>18</sub> H <sub>15</sub> Cl <sub>4</sub> OPSeW | C <sub>9</sub> H <sub>13</sub> Cl <sub>4</sub> NOSeW | C <sub>28</sub> H <sub>26</sub> Cl <sub>8</sub> N <sub>2</sub> Se <sub>2</sub> W <sub>2</sub> |
| M                                                         | 404.61                  | 682.88                                                | 555.81                                               | 1199.73                                                                                       |
| Crystal system                                            | monoclinic              | monoclinic                                            | monoclinic                                           | triclinic                                                                                     |
| Space group (no)                                          | P2 <sub>1</sub> /n (14) | P2 <sub>1</sub> /n (14)                               | C2/c (15)                                            | P-1 (2)                                                                                       |
| a /Å                                                      | 8.8639(2)               | 12.59105(17)                                          | 18.8765(10)                                          | 6.03153(11)                                                                                   |
| b /Å                                                      | 12.4149(2)              | 11.06907(14)                                          | 7.3681(3)                                            | 15.4384(4)                                                                                    |
| c /Å                                                      | 12.1003(3)              | 15.00109(19)                                          | 22.8710(13)                                          | 20.1476(5)                                                                                    |
| α /°                                                      | 90                      | 90                                                    | 90                                                   | 103.815(2)                                                                                    |
| β /°                                                      | 111.125(2)              | 96.3449(12)                                           | 104.559(6)                                           | 94.9132(17)                                                                                   |
| γ /°                                                      | 90                      | 90                                                    | 90                                                   | 98.3755(17)                                                                                   |
| U /Å <sup>3</sup>                                         | 1242.08(5)              | 2077.91(5)                                            | 3078.8(3)                                            | 1788.18(7)                                                                                    |
| Z                                                         | 8                       | 4                                                     | 8                                                    | 2                                                                                             |
| μ(Mo-K <sub>α</sub> )/mm <sup>-1</sup>                    | 55.880                  | 7.908                                                 | 10.546                                               | 9.084                                                                                         |
| F(000)                                                    | 1408                    | 1288                                                  | 2064                                                 | 1120                                                                                          |
| Total number reflns                                       | 18376                   | 56394                                                 | 20205                                                | 52666                                                                                         |
| R <sub>int</sub>                                          | 0.055                   | 0.041                                                 | 0.075                                                | 0.082                                                                                         |
| Unique reflns                                             | 2207                    | 6896                                                  | 3969                                                 | 8594                                                                                          |
| No. of params,<br>restraints                              | 109, 0                  | 235, 0                                                | 180, 55                                              | 379, 0                                                                                        |
| GOF                                                       | 1.017                   | 1.019                                                 | 1.053                                                | 1.058                                                                                         |
| R <sub>1</sub> , wR <sub>2</sub> [I > 2σ(I)] <sup>b</sup> | 0.016, 0.039            | 0.021, 0.037                                          | 0.040, 0.089                                         | 0.041, 0.096                                                                                  |
| R <sub>1</sub> , wR <sub>2</sub> (all data) <sup>b</sup>  | 0.018, 0.040            | 0.027, 0.038                                          | 0.052, 0.093                                         | 0.050, 0.100                                                                                  |

<sup>a</sup> common data: T = 100 K; wavelength (Mo-K<sub>α</sub>) = 0.71073 Å; θ(max) = 27.5°; <sup>b</sup> R<sub>1</sub> = Σ ||F<sub>o</sub>| - |F<sub>c</sub>|| / Σ |F<sub>o</sub>|; wR<sub>2</sub> = [Σw(F<sub>o</sub><sup>2</sup> - F<sub>c</sub><sup>2</sup>)<sup>2</sup> / ΣwF<sub>o</sub><sup>4</sup>]<sup>1/2</sup>.

Table S1 Cont.

| Compound                                                  | [WSeCl <sub>4</sub> (MeCN)]                        | [(WSeCl <sub>4</sub> ) <sub>2</sub> (dioxane)]                                | [(WSeCl <sub>4</sub> ) <sub>2</sub> (SeMe <sub>2</sub> )]                    | [(WCl <sub>3</sub> (SMe <sub>2</sub> )) <sub>2</sub> (μ-Se)(μ-Se <sub>2</sub> )]             |
|-----------------------------------------------------------|----------------------------------------------------|-------------------------------------------------------------------------------|------------------------------------------------------------------------------|----------------------------------------------------------------------------------------------|
| Formula                                                   | C <sub>2</sub> H <sub>3</sub> Cl <sub>4</sub> NSeW | C <sub>4</sub> H <sub>8</sub> Cl <sub>8</sub> O <sub>2</sub> SeW <sub>2</sub> | C <sub>2</sub> H <sub>6</sub> Cl <sub>8</sub> Se <sub>3</sub> W <sub>2</sub> | C <sub>4</sub> H <sub>12</sub> Cl <sub>6</sub> S <sub>2</sub> Se <sub>3</sub> W <sub>2</sub> |
| M                                                         | 445.66                                             | 897.32                                                                        | 918.25                                                                       | 941.54                                                                                       |
| Crystal system                                            | monoclinic                                         | monoclinic                                                                    | triclinic                                                                    | orthorhombic                                                                                 |
| Space group (no)                                          | P2 <sub>1</sub> /m (11)                            | C <sub>1</sub> /c (15)                                                        | P-1 (2)                                                                      | Pnma (62)                                                                                    |
| a /Å                                                      | 5.8784(2)                                          | 22.1170(4)                                                                    | 6.6025(2)                                                                    | 13.58820(13)                                                                                 |
| b /Å                                                      | 7.8378(4)                                          | 6.51400(10)                                                                   | 10.2899(5)                                                                   | 19.5279(2)                                                                                   |
| c /Å                                                      | 14.8140(6)                                         | 11.5767(2)                                                                    | 12.2583(6)                                                                   | 6.69716(7)                                                                                   |
| α /°                                                      | 90                                                 | 90                                                                            | 89.211(4)                                                                    | 90                                                                                           |
| β /°                                                      | 88.834(3)                                          | 90.841(2)                                                                     | 85.388(3)                                                                    | 90                                                                                           |
| γ /°                                                      | 90                                                 | 90                                                                            | 81.076(3)                                                                    | 90                                                                                           |
| U /Å <sup>3</sup>                                         | 682.39(5)                                          | 1667.68(5)                                                                    | 820.07(6)                                                                    | 1777.09(3)                                                                                   |
| Z                                                         | 2                                                  | 4                                                                             | 2                                                                            | 4                                                                                            |
| μ(Mo-K <sub>α</sub> )/mm <sup>-1</sup>                    | 11.860                                             | 19.419                                                                        | 21.945                                                                       | 40.932                                                                                       |
| F(000)                                                    | 396                                                | 1600                                                                          | 808                                                                          | 1680                                                                                         |
| Total number reflns                                       | 17488                                              | 17262                                                                         | 9411                                                                         | 30236                                                                                        |
| R <sub>int</sub>                                          | 0.062                                              | 0.073                                                                         | 0.035                                                                        | 0.038                                                                                        |
| Unique reflns                                             | 1882                                               | 2152                                                                          | 4223                                                                         | 1743                                                                                         |
| No. of params, restraints                                 | 50, 0                                              | 82, 0                                                                         | 138, 0                                                                       | 84, 0                                                                                        |
| GOF                                                       | 1.059                                              | 1.071                                                                         | 1.012                                                                        | 1.188                                                                                        |
| R <sub>1</sub> , wR <sub>2</sub> [I > 2σ(I)] <sup>b</sup> | 0.039, 0.103                                       | 0.021, 0.049                                                                  | 0.036, 0.072                                                                 | 0.030, 0.071                                                                                 |
| R <sub>1</sub> , wR <sub>2</sub> (all data) <sup>b</sup>  | 0.046, 0.109                                       | 0.023, 0.050                                                                  | 0.046, 0.078                                                                 | 0.030, 0.071                                                                                 |

Fig. S1. Rietveld fit to the PXRD pattern of WSeCl<sub>4</sub>. Blue crosses mark the data points, green continuous line the fit, cyan line the difference and blue tick marks the allowed reflecton positions. Strong peaks from the Al sample holder at 38.2 and 44.5 ° were excluded. The fit used the crystal structure described in Table S1 (P2<sub>1</sub>/n) with  $a = 8.9371(5)$ ,  $b = 12.5479(12)$ ,  $c = 12.2271(9)$  Å and  $\beta = 111.2098(17)$  °.

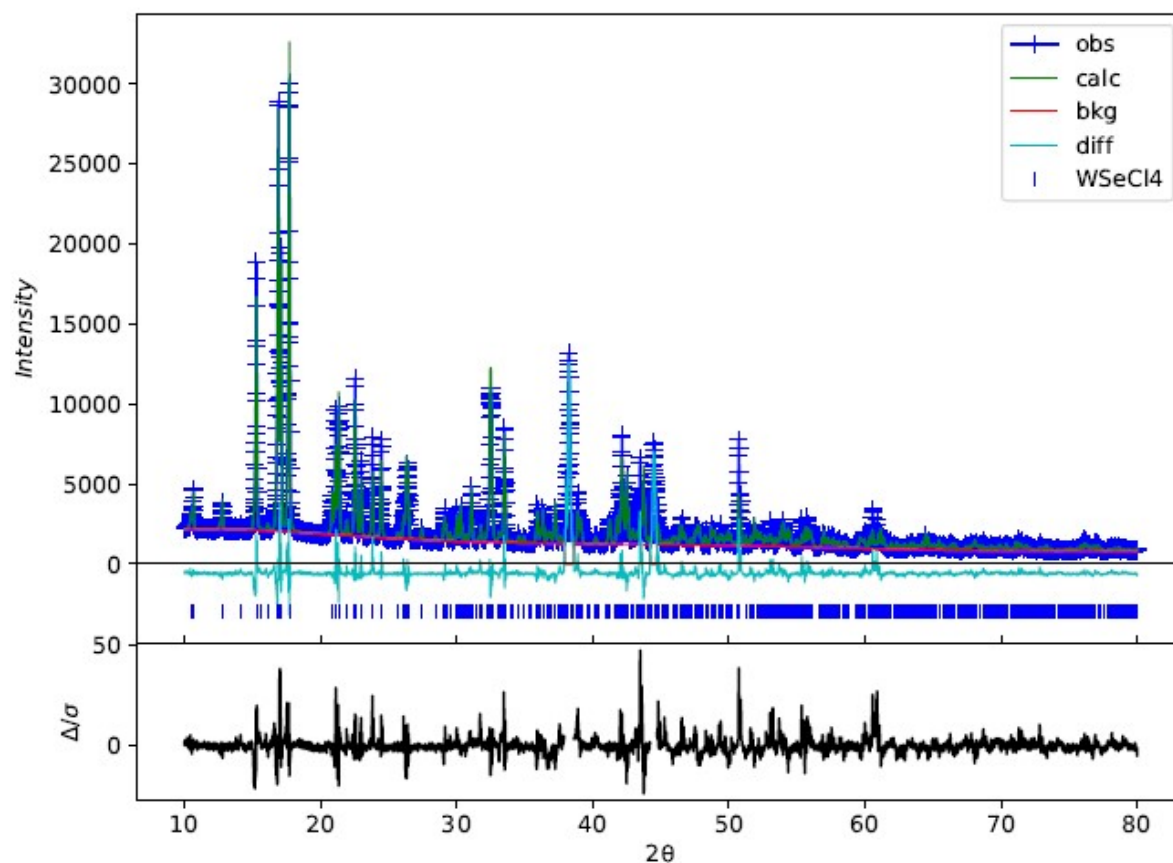

Fig. S2. IR Spectrum of  $\text{WSeCl}_4$  (Nujol)

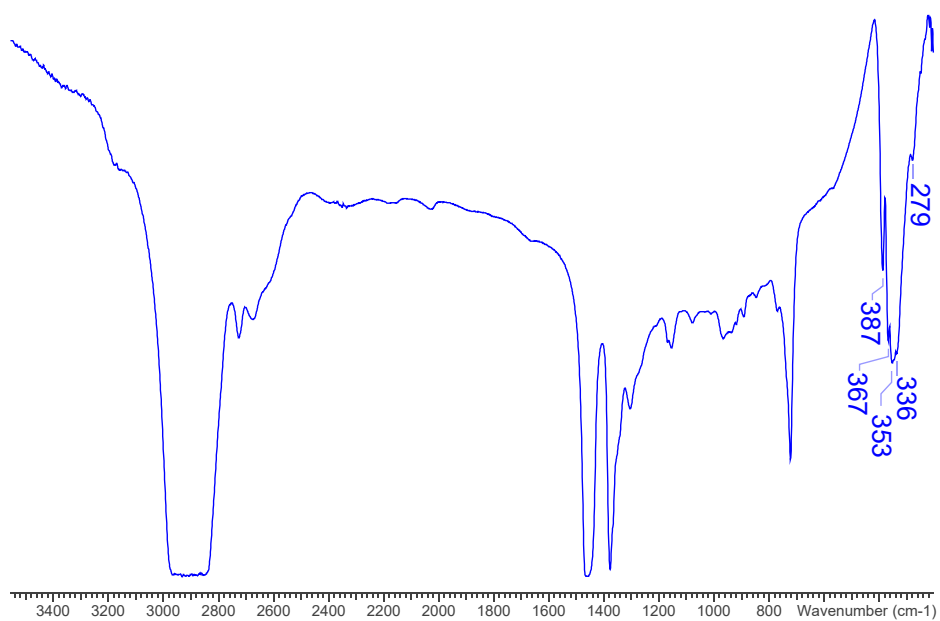

Fig. S3.  $^1\text{H}$  NMR spectrum of  $[\text{WSeCl}_4(\text{MeCN})]$  ( $\text{CD}_2\text{Cl}_2$ )

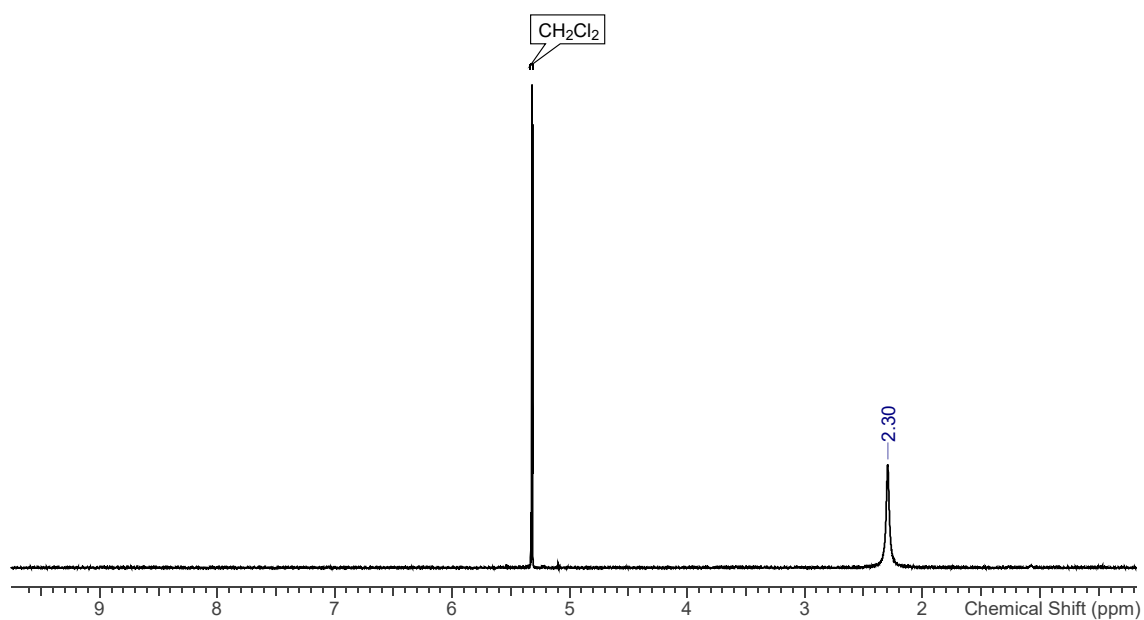

Fig. S4. IR Spectrum of  $[\text{WSeCl}_4(\text{MeCN})]$  (Nujol)

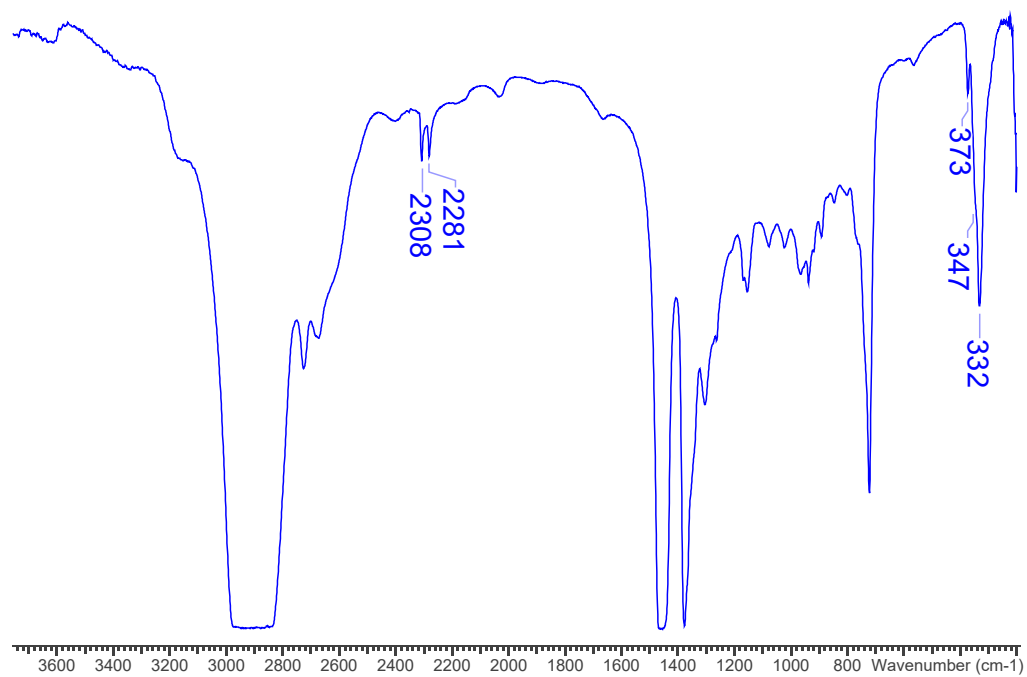

Fig. S5. <sup>1</sup>H NMR spectrum of  $[\text{WSeCl}_4(\text{thf})]$  ( $\text{CD}_2\text{Cl}_2$ )

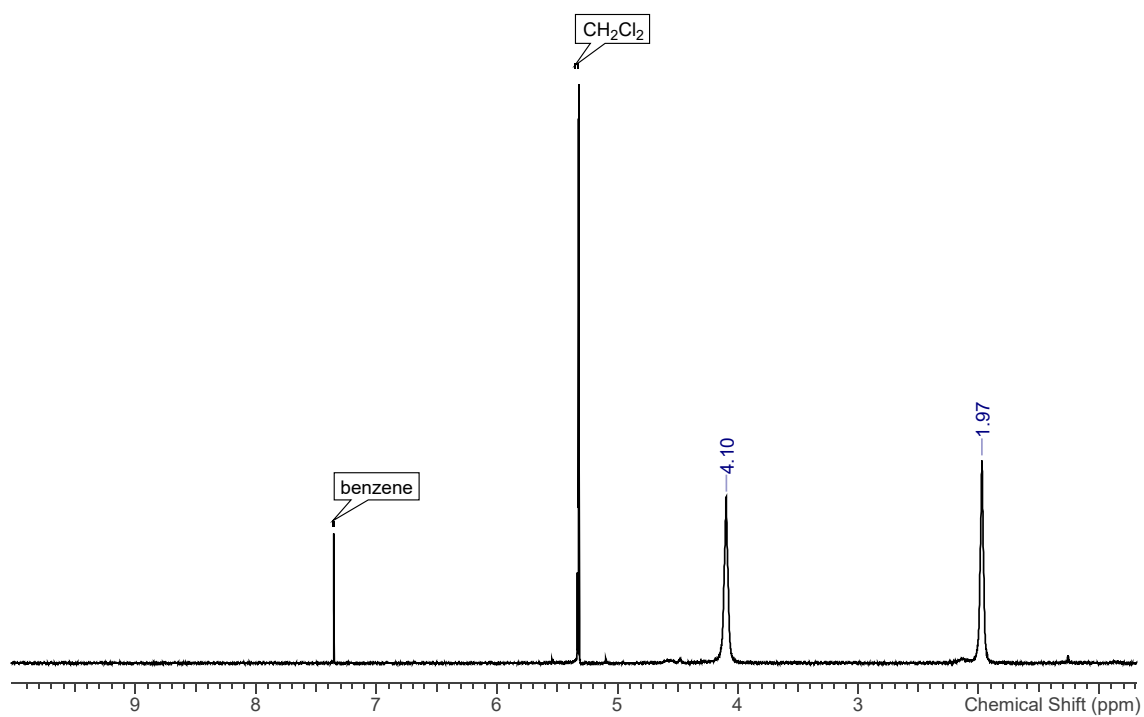

Fig. S6. IR Spectrum of [WSeCl<sub>4</sub>(thf)] (Nujol)

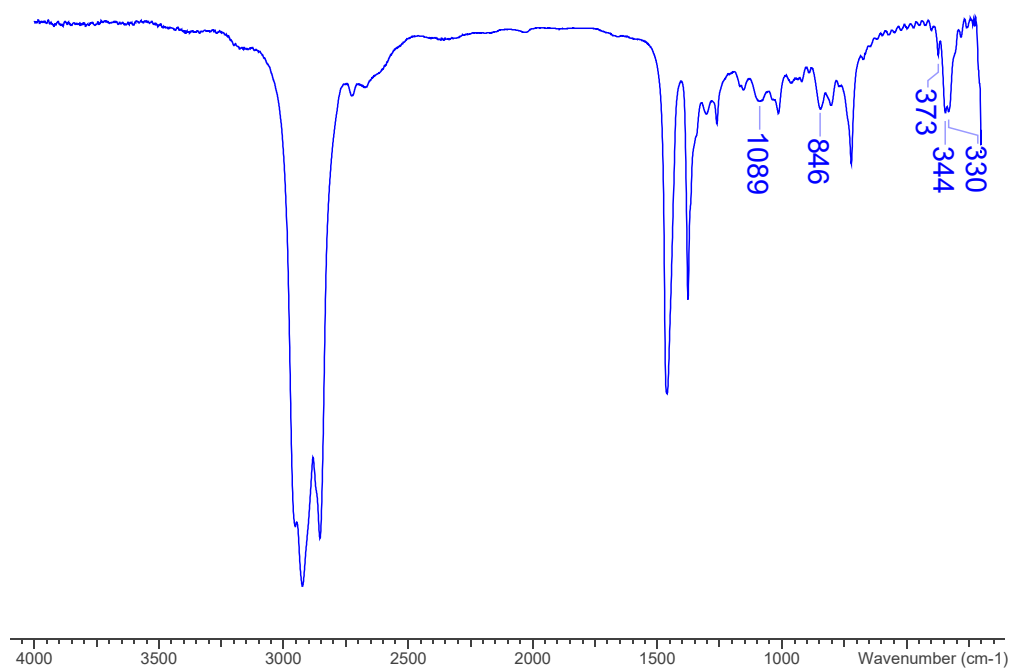

Fig. S7. <sup>1</sup>H NMR spectrum of [WSeCl<sub>4</sub>(OPPh<sub>3</sub>)] (CD<sub>2</sub>Cl<sub>2</sub>)

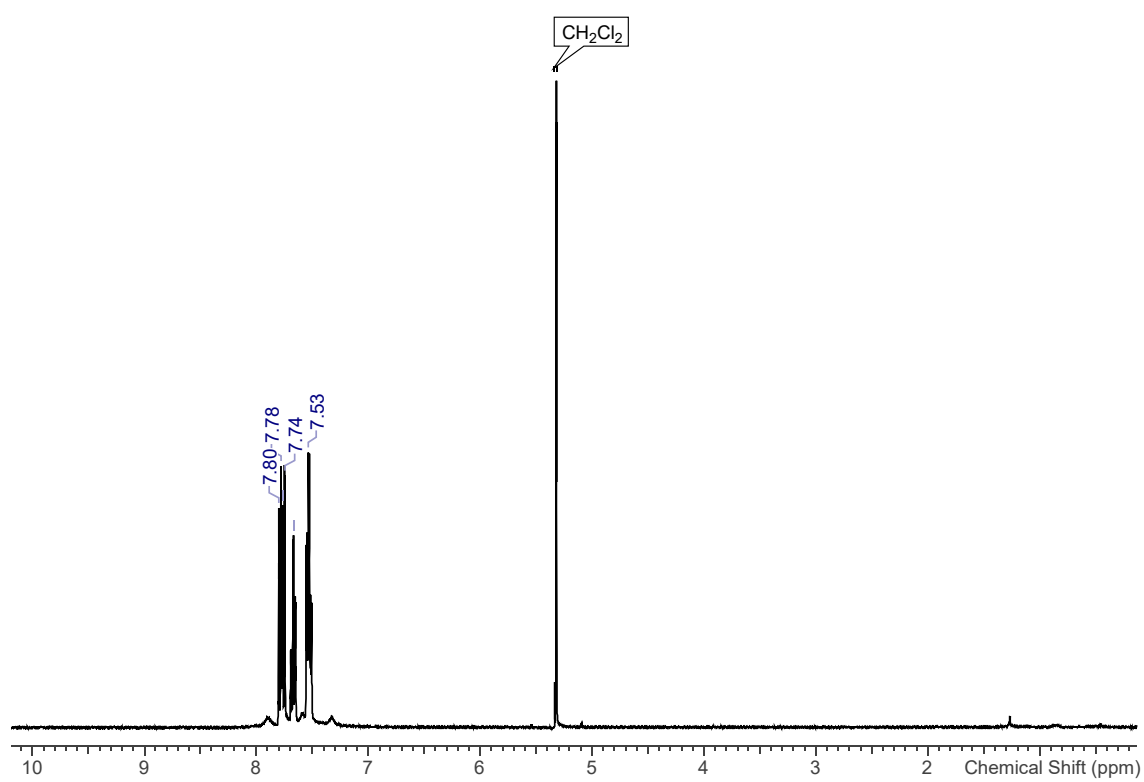

Fig. S8.  $^{31}\text{P}\{^1\text{H}\}$  NMR spectrum of  $[\text{WSeCl}_4(\text{OPPh}_3)]$  ( $\text{CD}_2\text{Cl}_2$ )

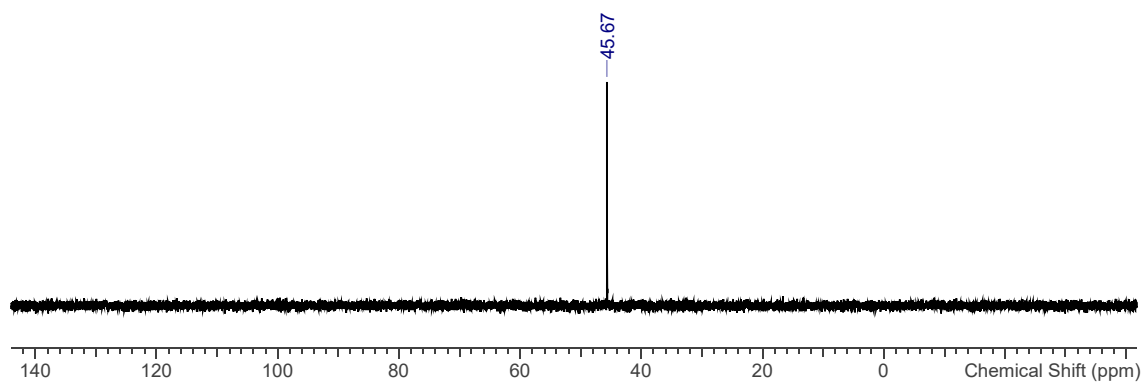

Fig. S9. IR Spectrum of  $[\text{WSeCl}_4(\text{OPPh}_3)]$  (Nujol)

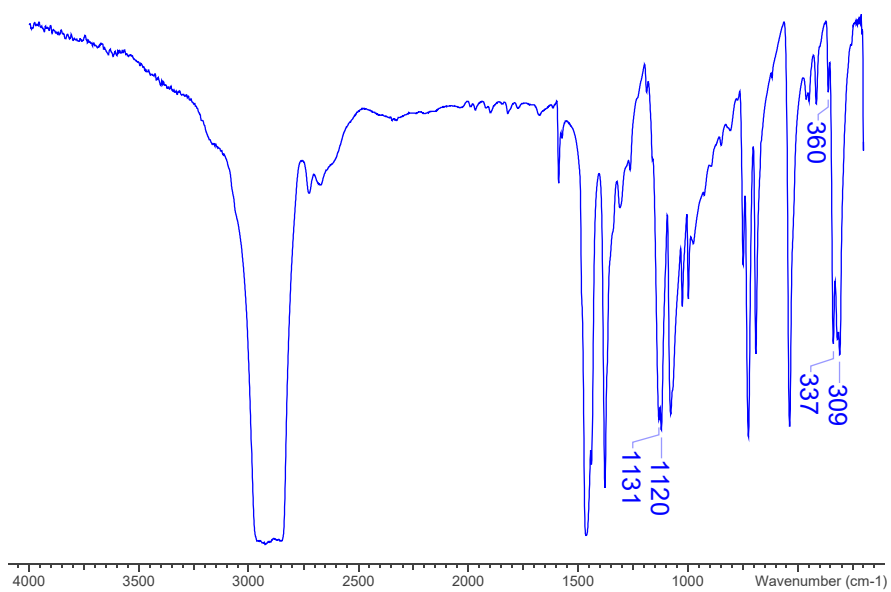

Fig. S10.  $^1\text{H}$  NMR spectrum of  $[\text{WSeCl}_4(\text{DMF})]$  ( $\text{C}_6\text{D}_6$ )

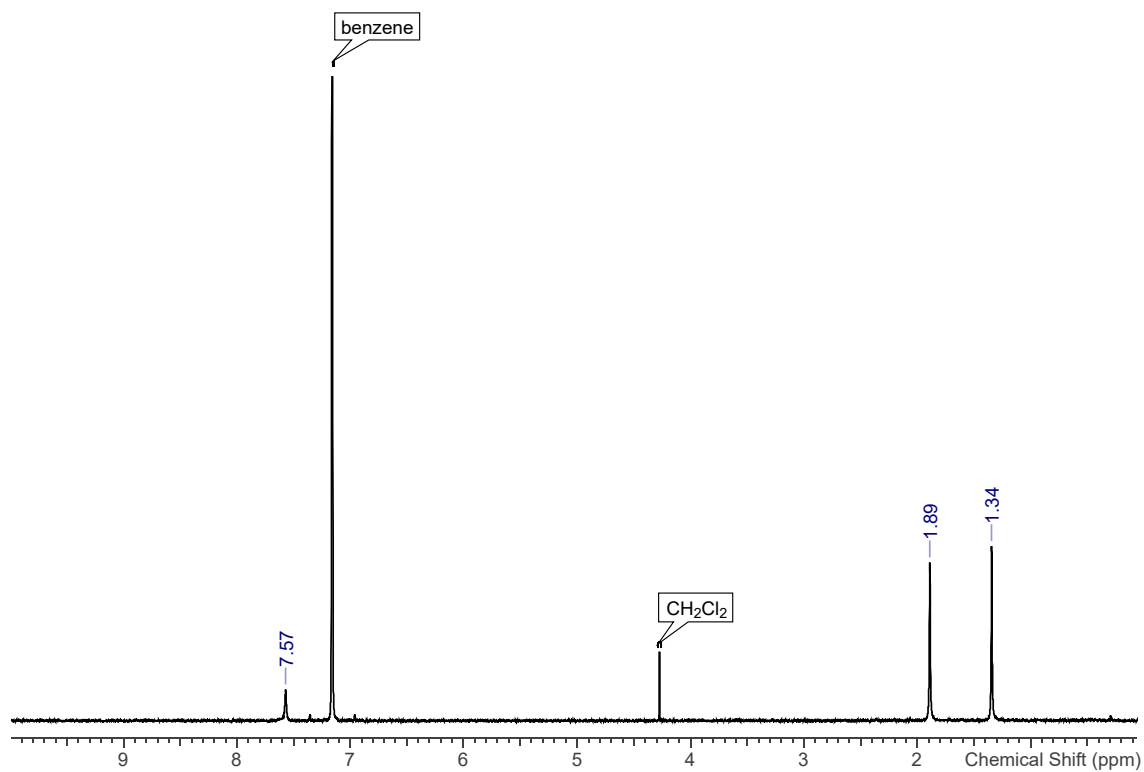

Fig. S11. IR Spectrum of [WSeCl<sub>4</sub>(DMF)] (Nujol)

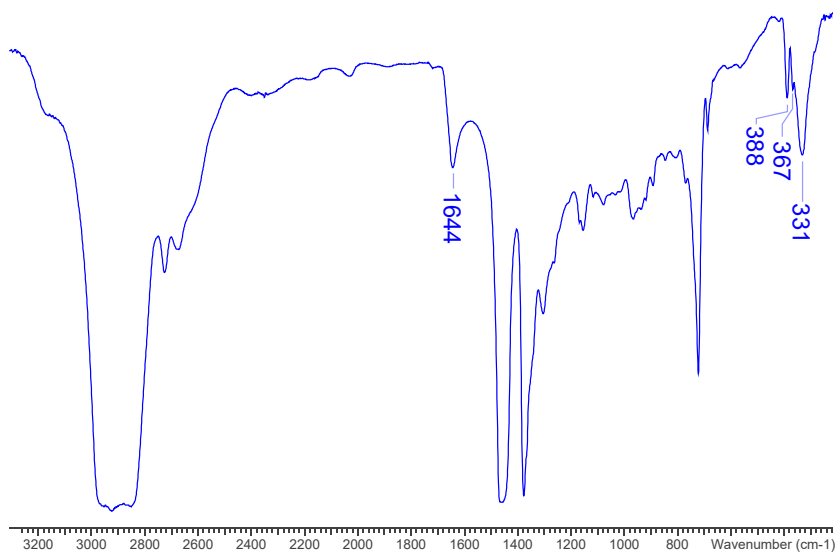



Fig. S12.  $^1\text{H}$  NMR Spectrum of  $[(\text{WSeCl}_4)_2(4,4'\text{-bipy})]$  ( $\text{CD}_2\text{Cl}_2$ )

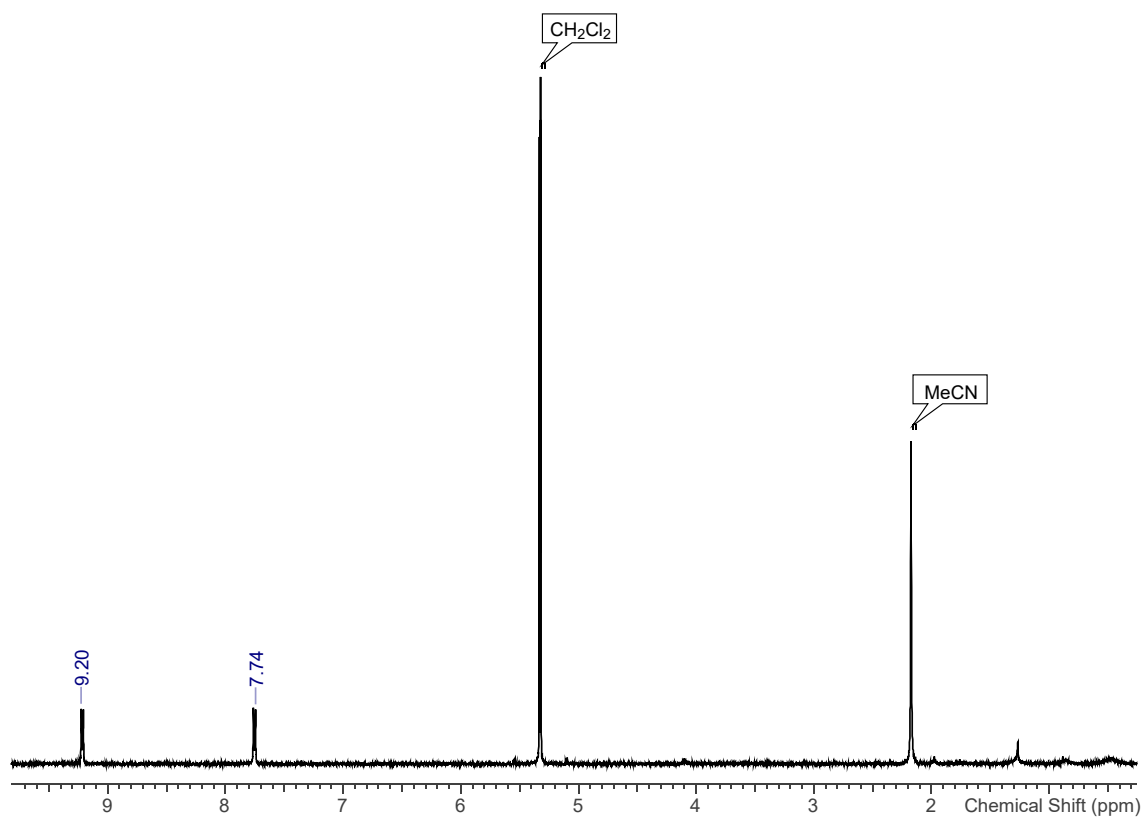

Fig. S13. IR Spectrum of  $[(\text{WSeCl}_4)_2(4,4'\text{-bipy})]$  (Nujol)

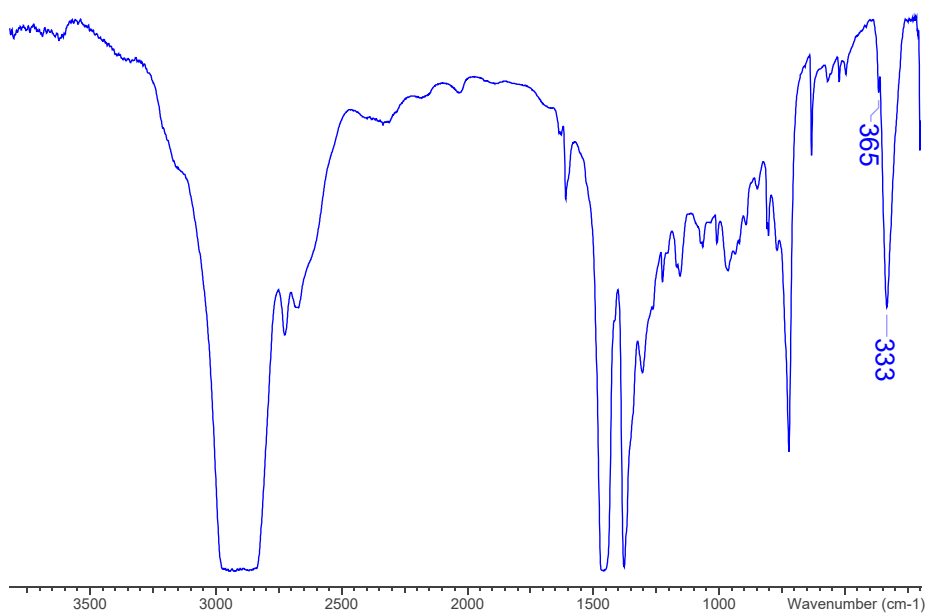

Fig. S14. IR Spectrum of [WSeCl<sub>4</sub>(py)] (Nujol)

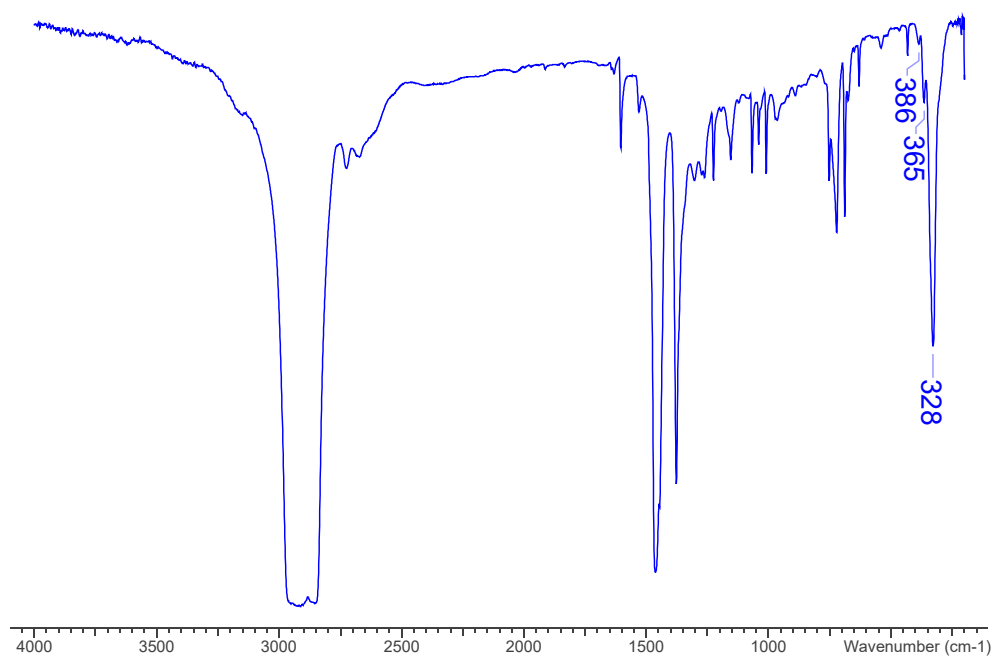

Fig. S15. <sup>1</sup>H NMR Spectrum of [WSeCl<sub>4</sub>(py)] (CD<sub>2</sub>Cl<sub>2</sub>)

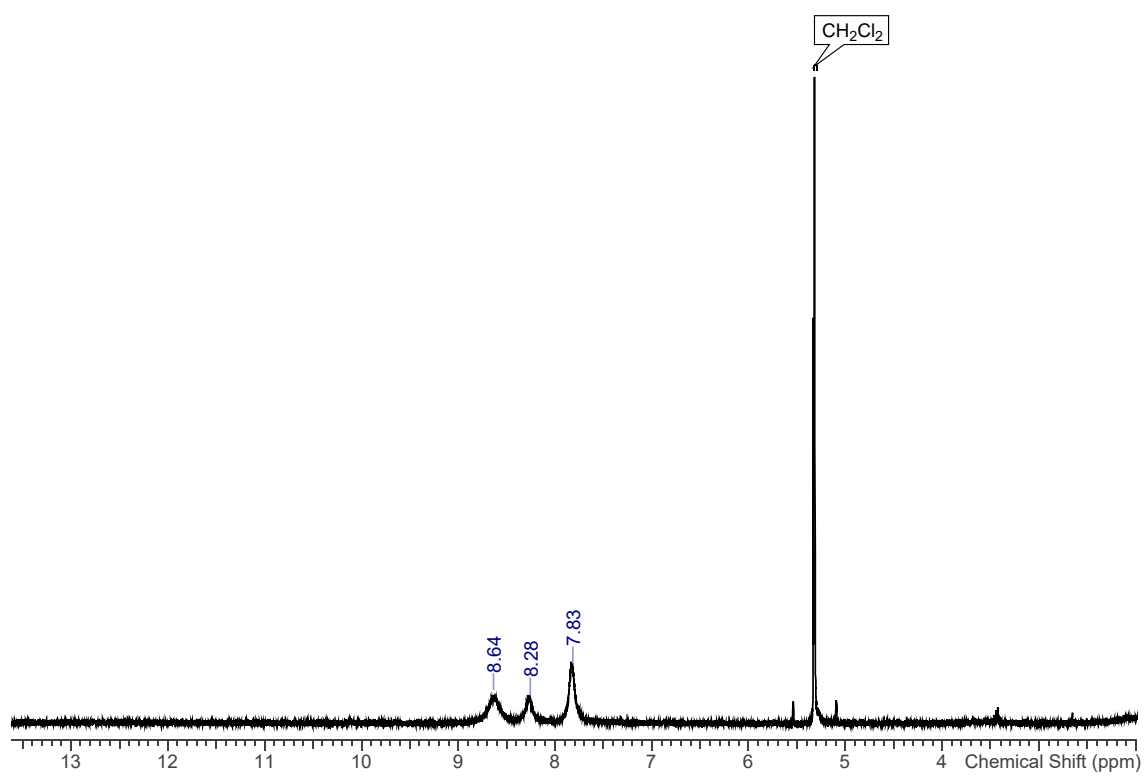

Fig. S16. IR spectrum of [WSeCl<sub>4</sub>(2,2'-bipy)] (Nujol)

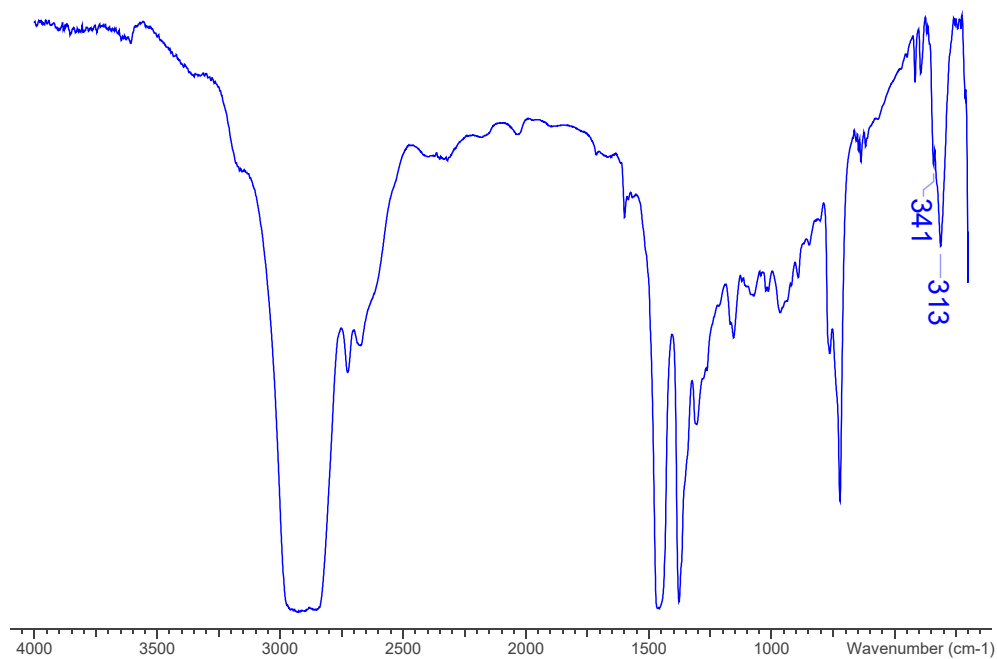

Fig. S17. <sup>1</sup>H NMR spectrum of [WSeCl<sub>4</sub>(2,2'-bipy)] (CD<sub>2</sub>Cl<sub>2</sub>)

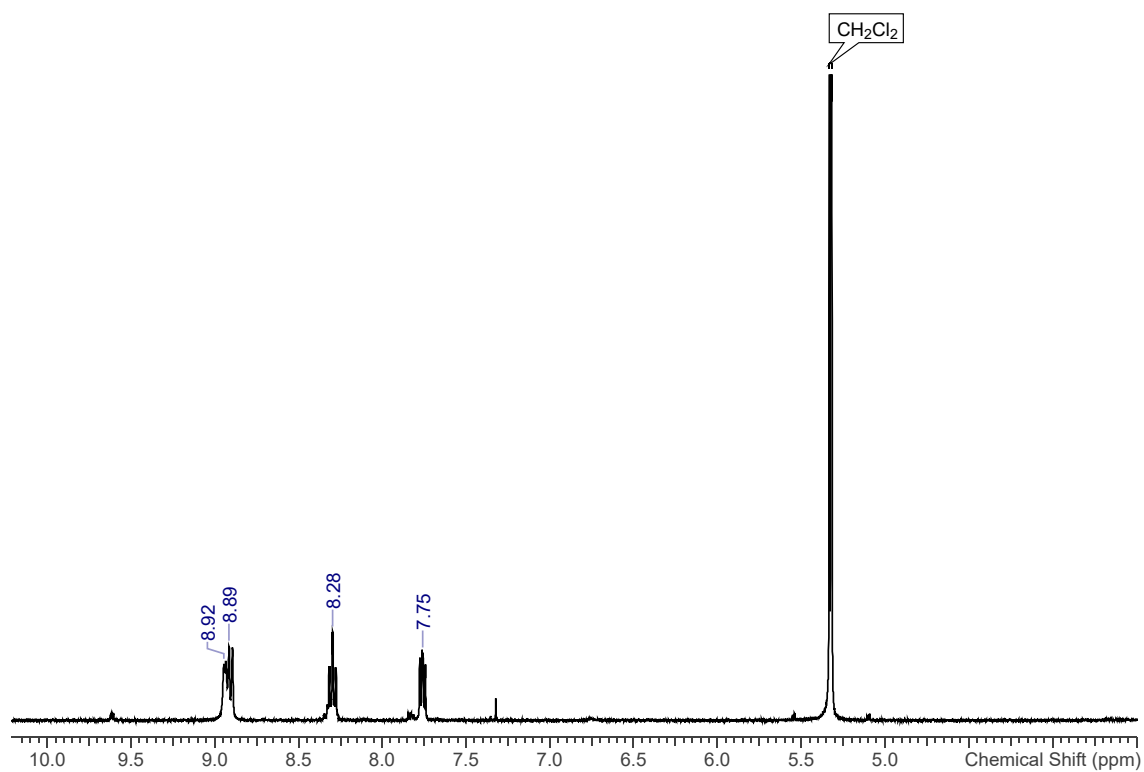

Fig. S18. IR spectrum of  $[(WSeCl_4)(\mu-dppmO_2)]$  (Nujol)

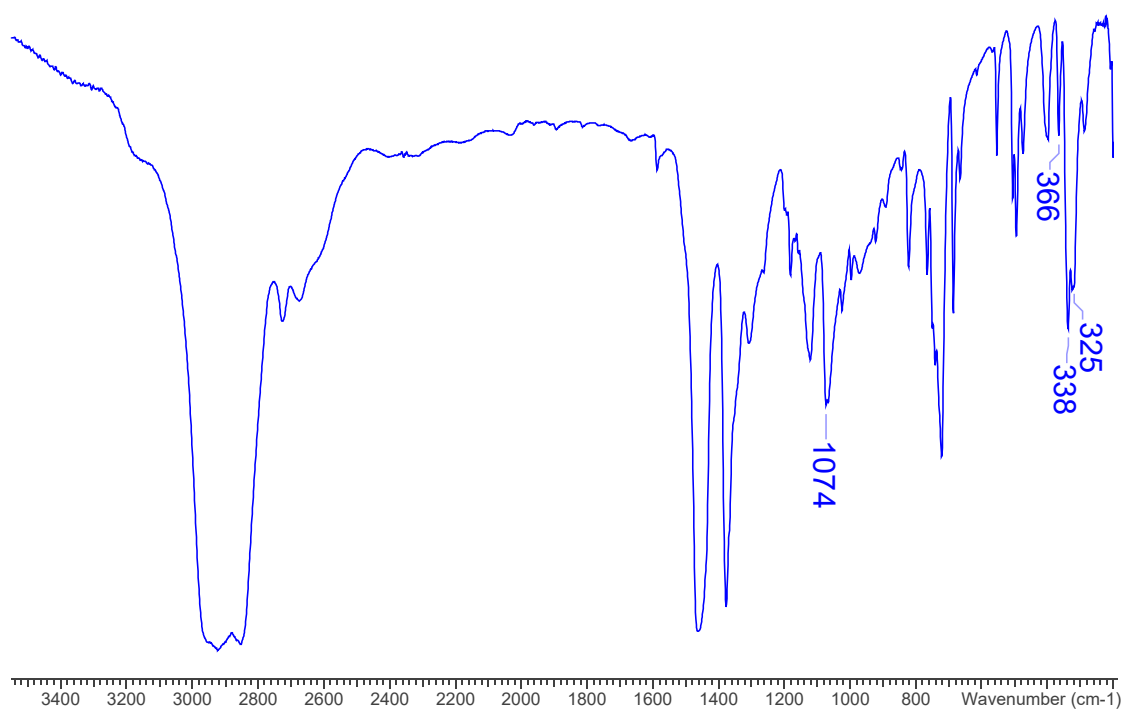

Fig. S19.  $^1H$  NMR spectrum of  $[(WSeCl_4)(\mu-dppmO_2)]$  recorded *in situ* in  $C_6D_6$

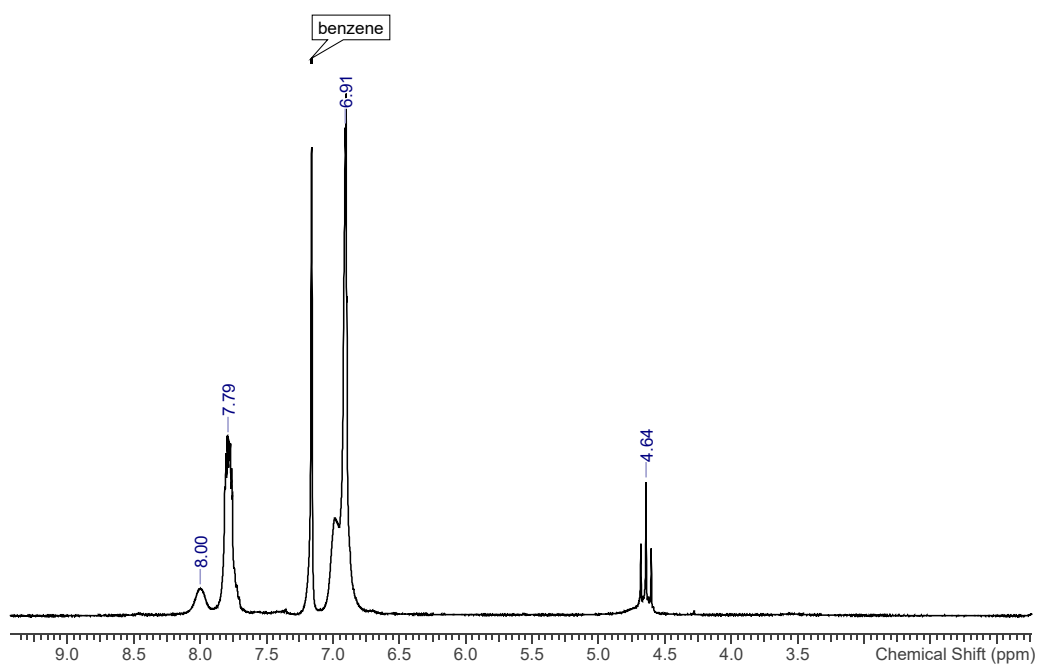

Fig. S20.  $^{31}\text{P}\{^1\text{H}\}$  NMR spectrum of  $[(\text{WSeCl}_4)(\mu\text{-dppmO}_2)]$  ( $\text{C}_6\text{D}_6$ )

\* Decomposition product

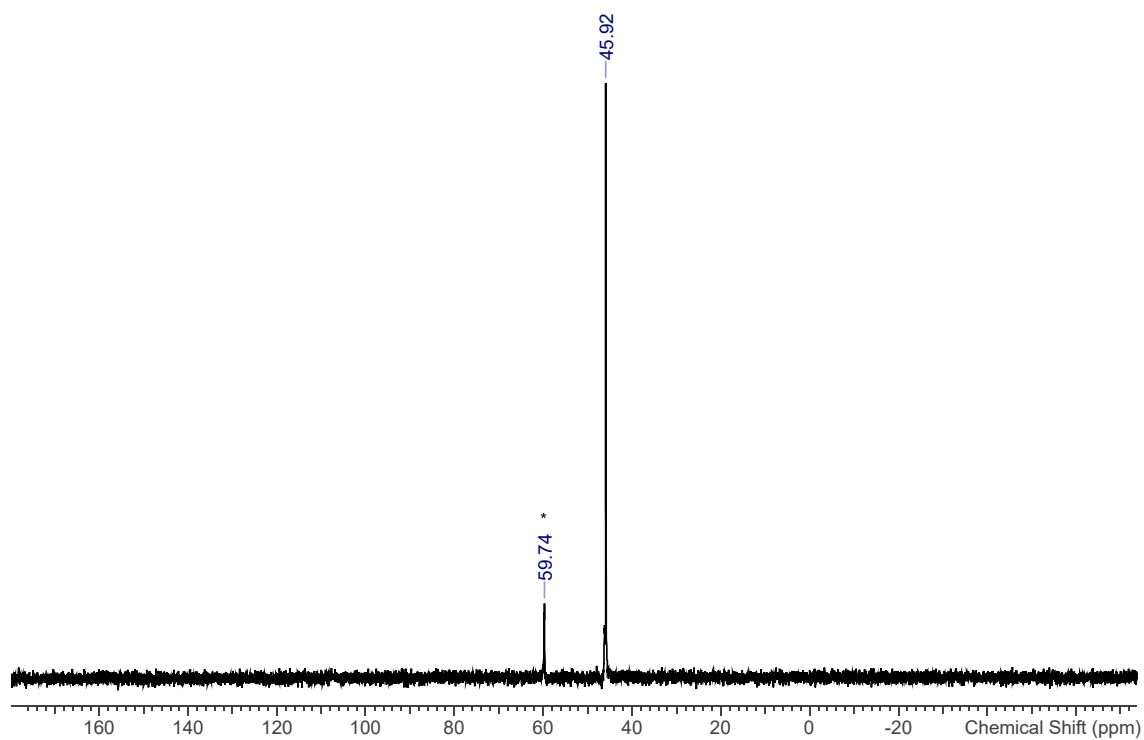

Fig. S21. IR spectrum of  $[(\text{WSeCl}_4)_2(1,4 \text{ dioxane})]$  (Nujol)

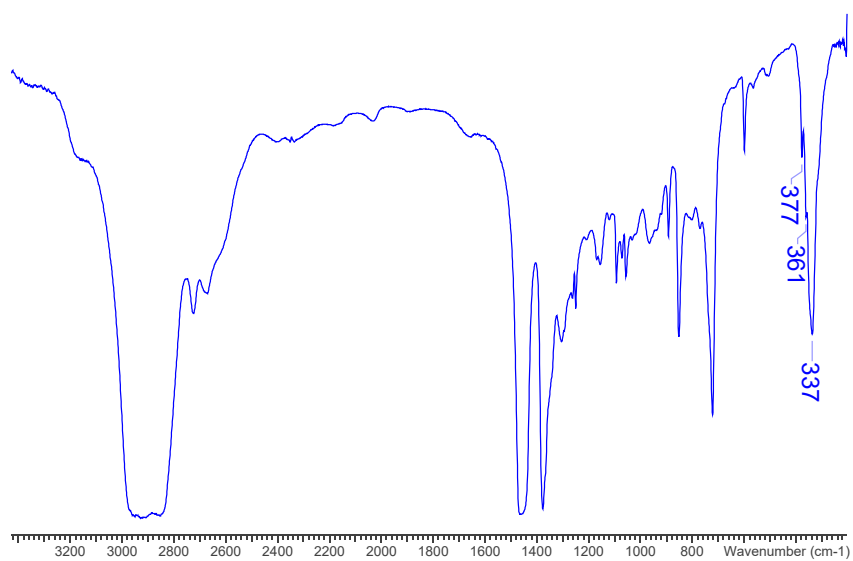

Fig. S22.  $^1\text{H}$  NMR spectrum of  $[(\text{WSeCl}_4)_2(1,4 \text{ dioxane})]$  ( $\text{C}_6\text{D}_6$ )

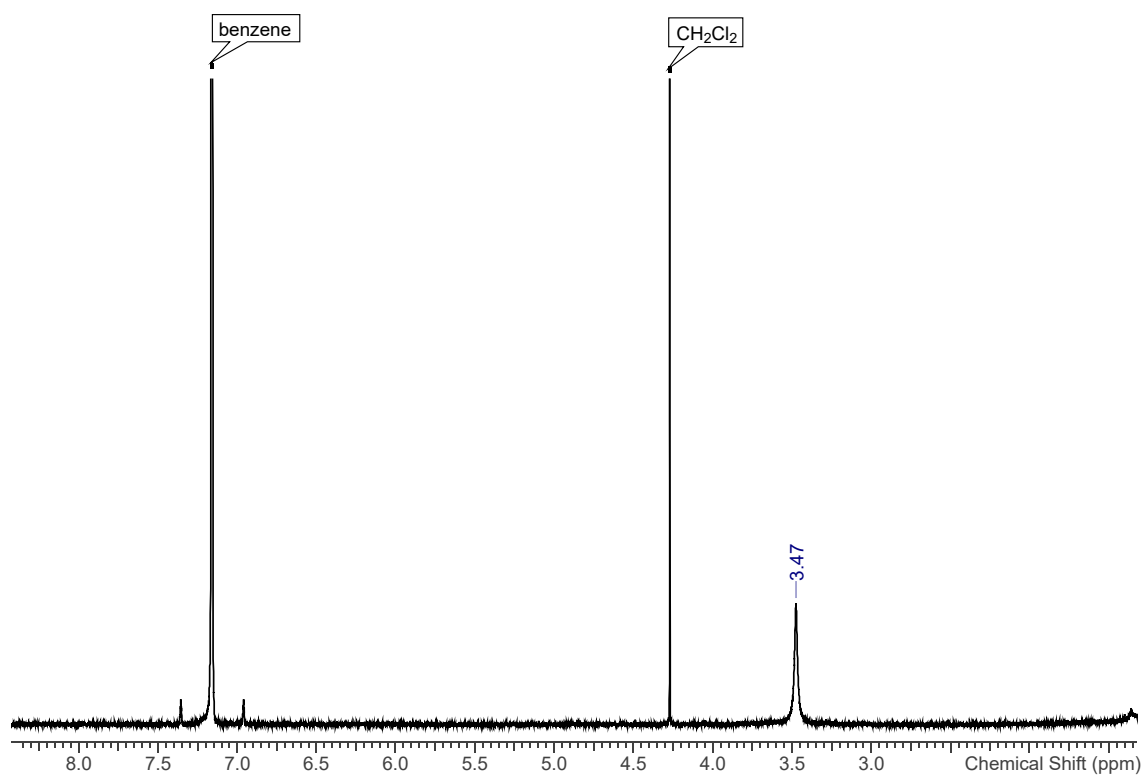

Fig. S23. IR spectrum of  $[\text{WSeCl}_4(\text{SeMe}_2)]$  (Nujol)

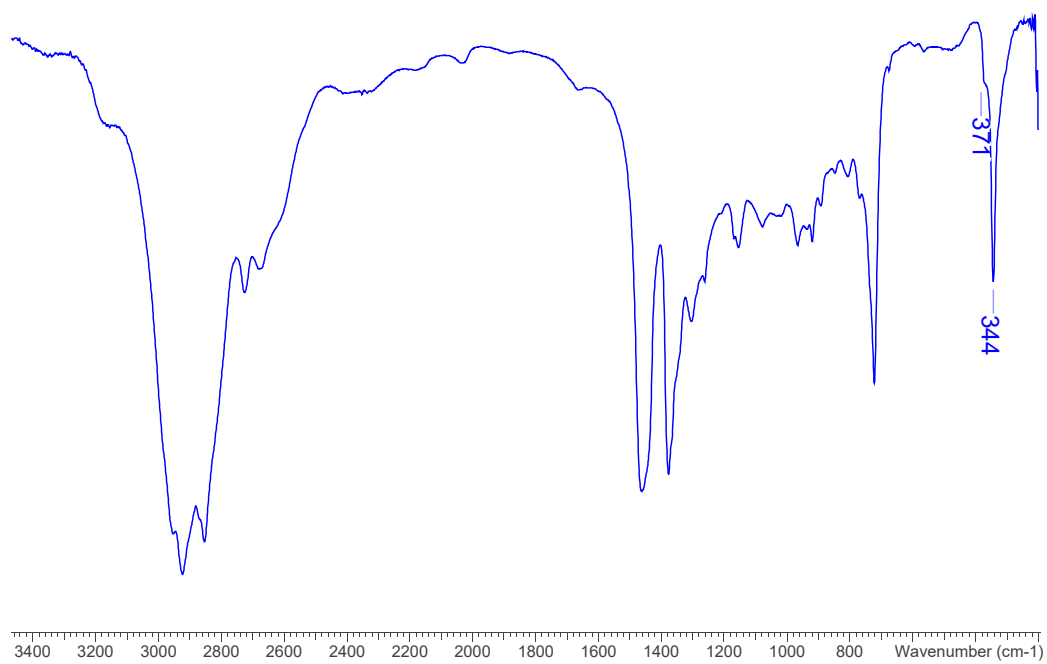

Fig. S24.  $^1\text{H}$  NMR spectrum of  $[\text{WSeCl}_4(\text{SeMe}_2)]$  ( $\text{C}_6\text{D}_6$ )

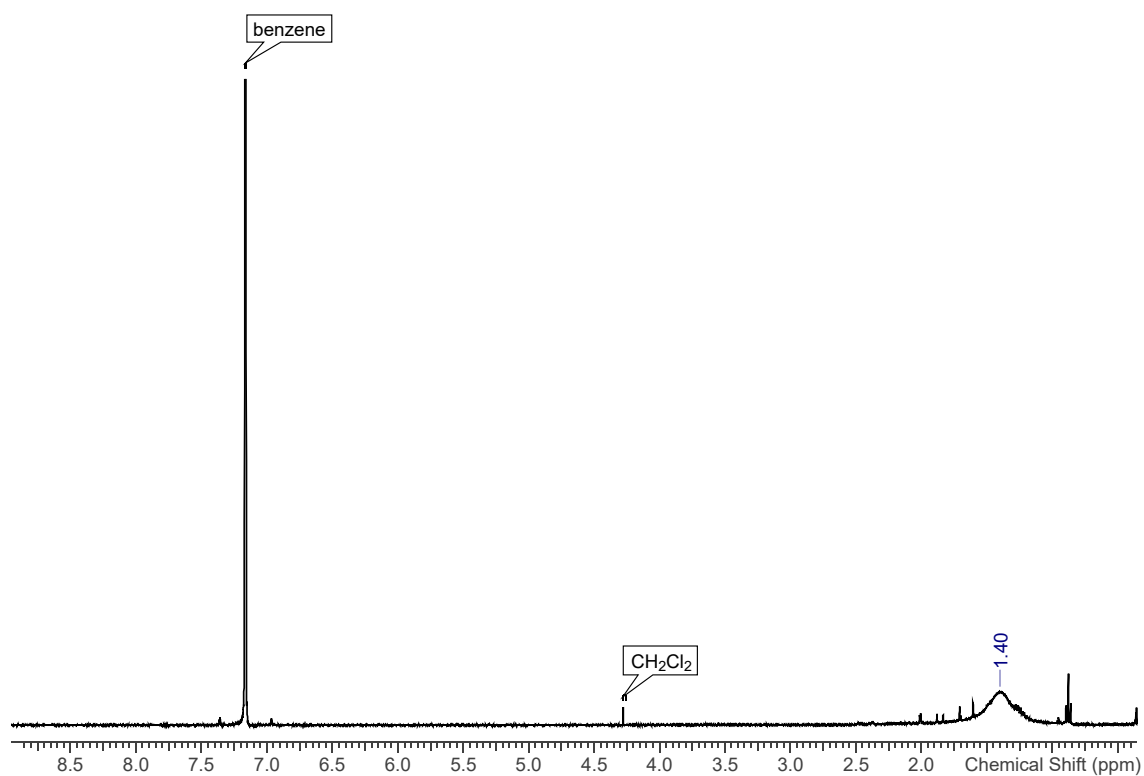

Fig. S25.  $^{77}\text{Se}\{^1\text{H}\}$  NMR spectrum of  $[\text{WSeCl}_4(\text{SeBu}_2)]$  (298 K)

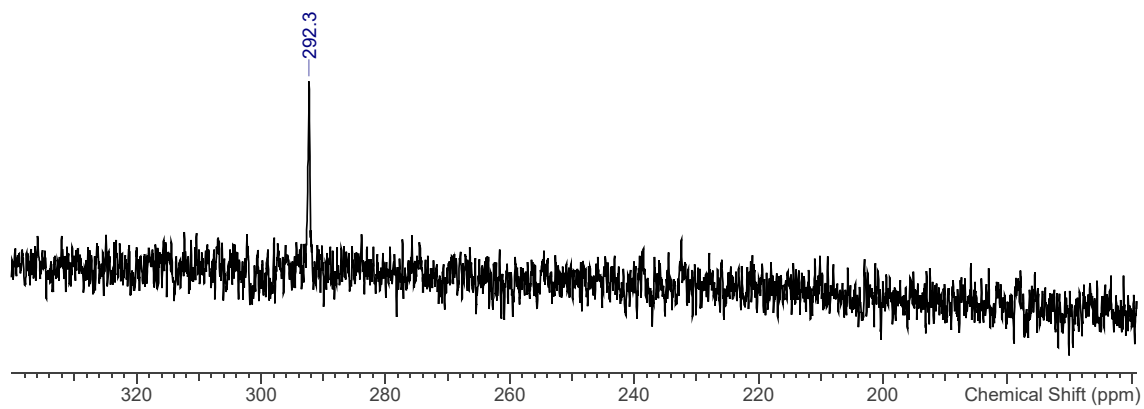

Fig. S26.  $^{77}\text{Se}\{^1\text{H}\}$  NMR spectrum of  $[\text{WSeCl}_4(\text{SeBu}_2)]$  (183 K)

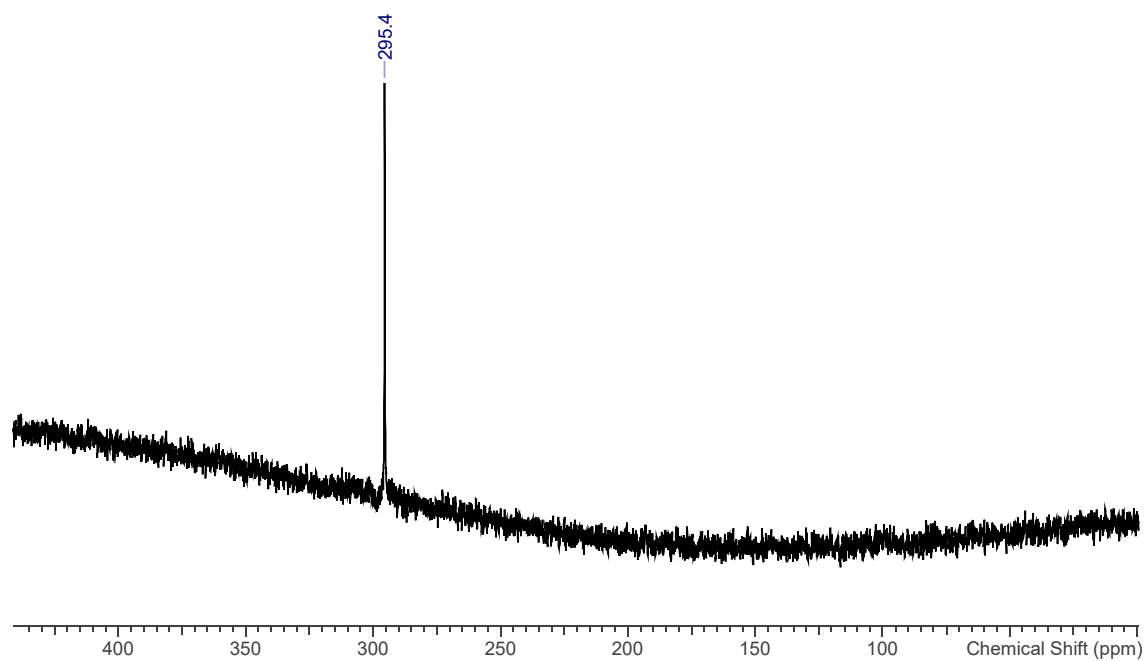

Fig. S27. IR spectrum of  $[\text{WSeCl}_4(\text{SeBu}_2)]$  (Nujol)

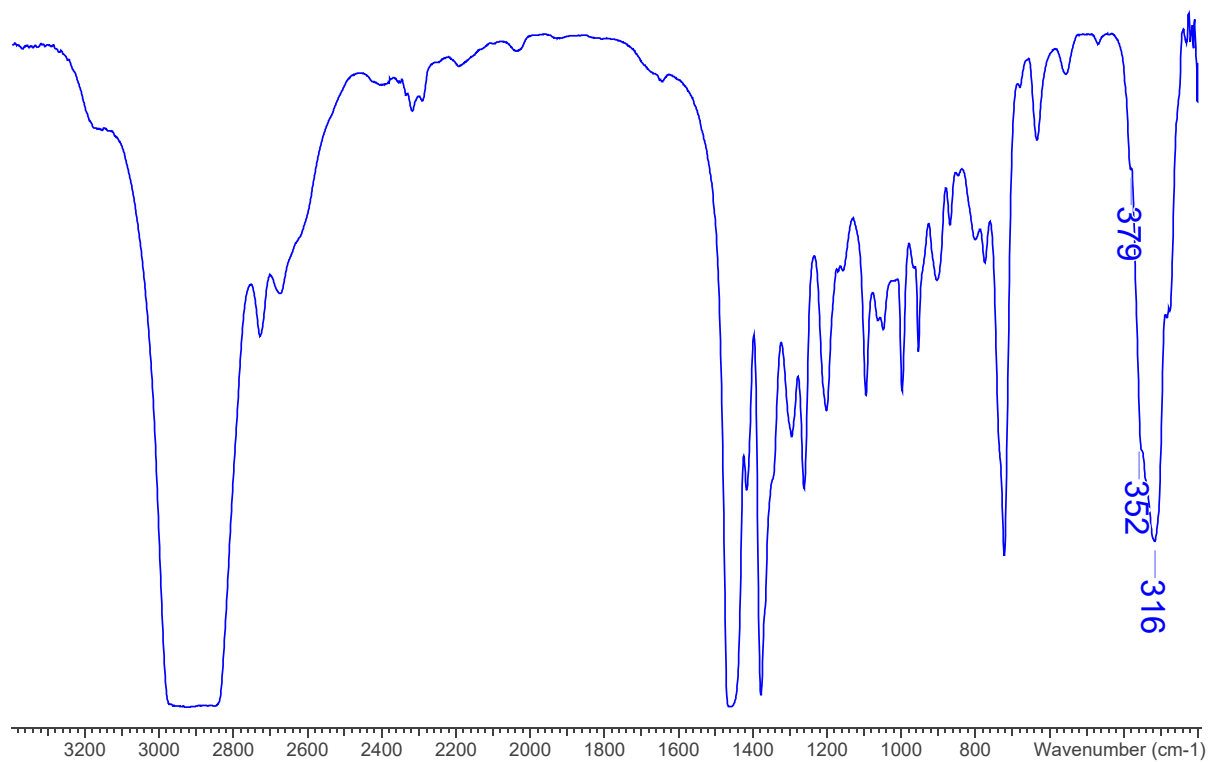



Fig. S28.  $^1\text{H}$  NMR spectrum of  $[\text{WSeCl}_4(\text{SeBu}_2)]$  ( $\text{C}_6\text{D}_6$ )

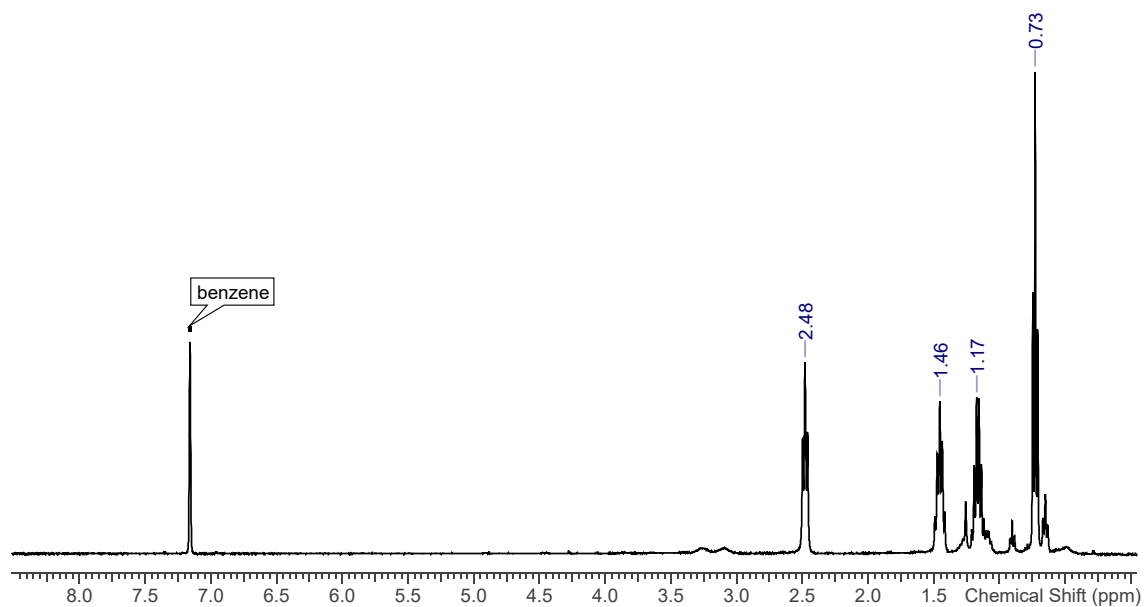

Fig. S29 Grazing incidence XRD patterns from  $\text{WSe}_2$  thin films deposited at different temperatures in this work.

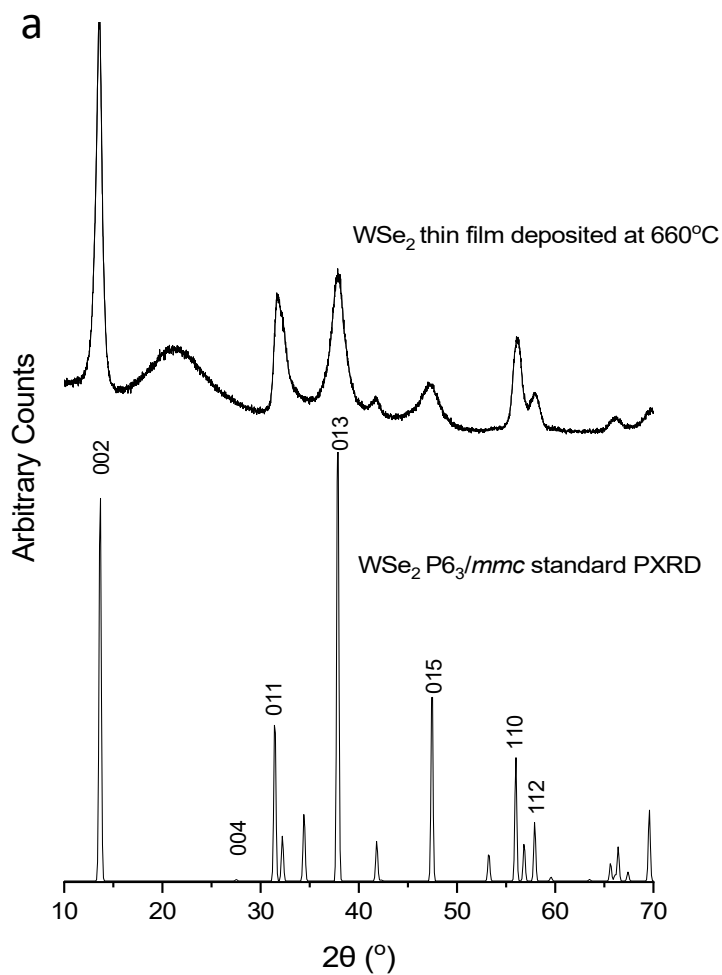

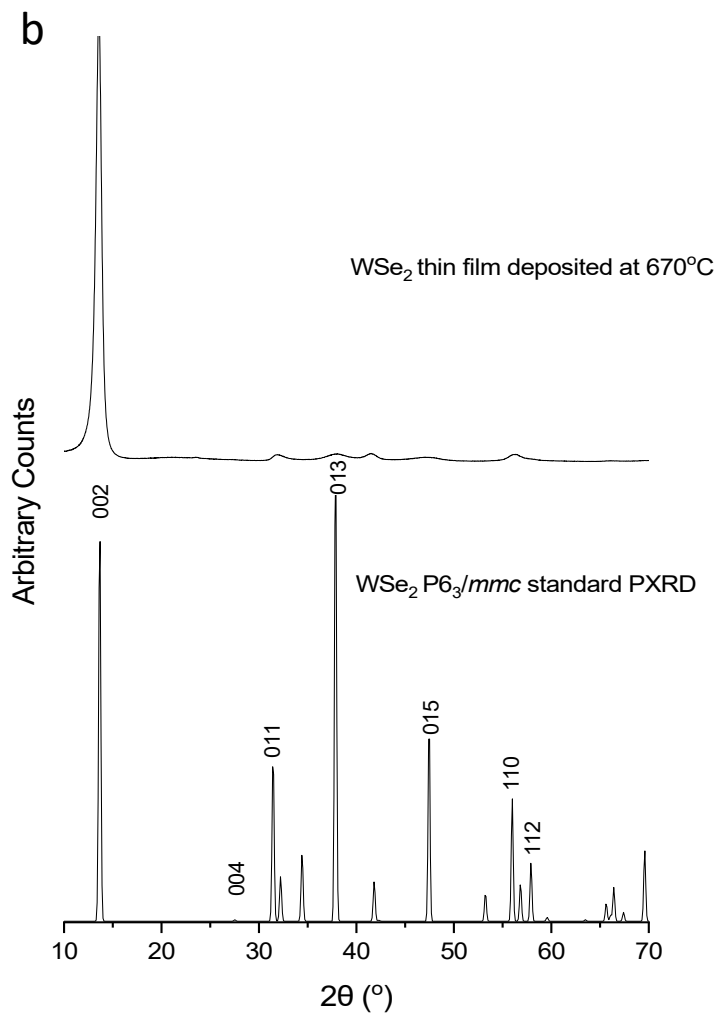

## Density Functional Theory (DFT) calculations:

Table S2: Comparative structural data for WSeCl<sub>4</sub>

| WSeCl <sub>4</sub> | X-ray                                            |                                                  | E-diffraction* | DFT**                                            | Literature calculations |                      |
|--------------------|--------------------------------------------------|--------------------------------------------------|----------------|--------------------------------------------------|-------------------------|----------------------|
| W=Se (Å)           | 2.2099(4)                                        | 2.2128(4)                                        | 2.203 (4)      | 2.24460                                          | 2.17 <sup>(a)</sup>     | 2.260 <sup>(b)</sup> |
| W-Cl (Å)           | 2.2944(9)<br>2.3048(8)<br>2.3045(8)<br>2.3038(9) | 2.2689(8)<br>2.2762(9)<br>2.3419(8)<br>2.3949(8) | 2.284 (3)      | 2.37178<br>2.38413<br>2.36433<br>2.36069         | 2.33 <sup>(a)</sup>     | 2.363 <sup>(b)</sup> |
| Se...Cl (Å)        | 3.488<br>3.500<br>3.508<br>3.488                 | 3.471<br>3.445<br>3.468<br>3.470                 | 3.545 (9)      | 3.58184<br>3.58279<br>3.58233<br>3.58269         |                         |                      |
| Cl...Cl (Å)        | 3.181<br>3.203<br>3.185<br>3.187                 | 3.220<br>3.254<br>3.205<br>3.255                 | 3.129 (6)      | 3.18320<br>3.18395<br>3.18327<br>3.18379         |                         |                      |
| Cl...Cl (Å)        | 4.516<br>4.505                                   | 4.597<br>4.549                                   | 4.425 (9)      | 4.50179<br>4.50266                               |                         |                      |
| Se-W-Cl (°)        | 101.46<br>101.45<br>101.98<br>101.66             | 101.49<br>101.18<br>98.24<br>97.65               | 104.4 (3)      | 104.13557<br>104.18248<br>104.15197<br>104.16753 | 105 <sup>(a)</sup>      | 103.6 <sup>(b)</sup> |
| Cl-W-Cl (°)        | 87.68<br>87.75<br>87.30<br>88.06                 | 88.58<br>91.45<br>88.32<br>85.15                 | 86.5 (2)       | 86.55511<br>86.58812<br>86.56221<br>86.57228     |                         |                      |

\* Diffraction data: <https://pubs.acs.org/doi/pdf/10.1021/ic00139a006>

\*\* DFT (6-311G\* on Se, Cl and LanL2dz on W)

<sup>(a)</sup> *ab initio* molecular quantum chemistry calculations using GAMESS (Ref. 1)

<sup>(b)</sup> DFT calculations using ADF program (Ref. 2)

Fig. S30: Frontier molecular orbitals of  $\text{WSeCl}_4$  and  $\text{WSeCl}_4$

| eV              | $\text{WSeCl}_4$                                                                    | eV              | $\text{WSeCl}_4$                                                                      |
|-----------------|-------------------------------------------------------------------------------------|-----------------|---------------------------------------------------------------------------------------|
| LUMO+1<br>-4.50 | 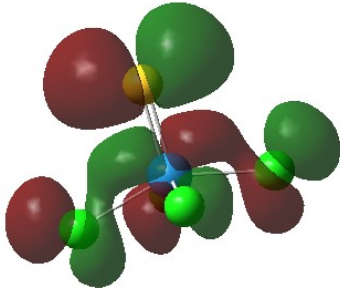   | LUMO+1<br>-4.50 |    |
| LUMO<br>-5.49   |    | LUMO<br>-5.34   |    |
| HOMO<br>-8.74   |   | HOMO<br>-8.54   |   |
| HOMO-1<br>-8.93 |  | HOMO-1<br>-8.55 |  |
| HOMO-2<br>-8.93 |  | HOMO-2<br>-8.65 |  |

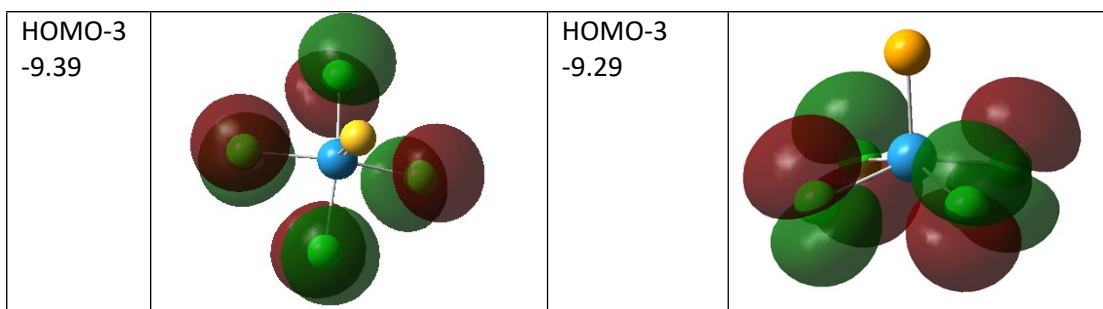

Table S3: Comparative structural data for  $WCl_4(OPPh_3)$  (E = S, Se) bond distances (Å)

|      | [WCl <sub>4</sub> (OPPh <sub>3</sub> )] |         | [WSeCl <sub>4</sub> (OPPh <sub>3</sub> )] |         |
|------|-----------------------------------------|---------|-------------------------------------------|---------|
|      | X-ray*                                  | DFT     | X-ray                                     | DFT     |
| W-E  | 2.0938(6)                               | 2.11048 | 2.2321(2)                                 | 2.24460 |
| W-Cl | 2.3196(6)                               | 2.36959 | 2.3514(5)                                 | 2.37178 |
|      | 2.3141(6)                               | 2.36256 | 2.3577(5)                                 | 2.38413 |
|      | 2.23488(5)                              | 2.35912 | 2.3217(5)                                 | 2.36433 |
|      | 2.3447(7)                               | 2.38193 | 2.3218(5)                                 | 2.36069 |
| W-O  | 2.163(2)                                | 2.14443 | 2.1669(14)                                | 2.14717 |

\*data from Ref. 3

Table S4: Energies of monomers and dimers of  $WCl_4$  (E = S, Se)

|                    | au           |
|--------------------|--------------|
| WCl <sub>4</sub>   | -2307.141894 |
| WS dimer           | -4614.313648 |
| WSeCl <sub>4</sub> | -4310.482002 |
| WSe dimer          | -8620.993048 |

Table S5: Energies of [WCl<sub>4</sub>(OPPh<sub>3</sub>)] (E = S, Se)

|                                           | au           |
|-------------------------------------------|--------------|
| OPPh <sub>3</sub>                         | -1111.827444 |
| WCl <sub>4</sub>                          | -2307.141894 |
| WSeCl <sub>4</sub>                        | -4310.482002 |
| [WCl <sub>4</sub> (OPPh <sub>3</sub> )]   | -3419.030719 |
| [WSeCl <sub>4</sub> (OPPh <sub>3</sub> )] | -5422.369043 |

## References

1. M. T. Benson, T. R. Cundari, S. J. Lim, H. D. Nguyen and K. Pierce-Beaver, *J. Am. Chem. Soc.*, 1994, **116**, 3955.
2. Ò. González-Blanco, V. Branchadell, K. Monteyne and T. Ziegler, *Inorg. Chem.*, 1998, **37**, 1744.
3. V. K. Greenacre, A. L. Hector, W. Levason, G. Reid, D. E. Smith and L. Sutcliffe, *Polyhedron*, 2019, **162**, 14.
